# Supplementary material for: The use of ASH-15 flowstone as a matrix-matched reference material for laser-ablation U-Pb geochronology of calcite
Source: Copernicus journal article supplement (doi:10.5194/gchron-2020-22), 2020-07-27
Supplement: Supplementary file [file gchron-2020-22-RC1-supplement.pdf]

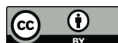

1 **The use of ASH-15 flowstone as a matrix-matched reference material for laser-ablation**

2 **U-Pb geochronology of calcite**

3 Perach Nuriel<sup>1</sup>, Jörn-Frederik Wotzlaw<sup>2</sup>, Maria Ovtcharova<sup>3</sup>, Anton Vaks<sup>1</sup>, Ciprian Stremtan<sup>4</sup>,

4 Martin Šala<sup>5</sup>, Nick M. W. Roberts<sup>6</sup>, and Andrew R. C. Kylander-Clark<sup>7</sup>

5

6 <sup>1</sup> Geological Survey of Israel, 32 Yeshayahu Leibowitz St. Jerusalem, 9692100, Israel

7 <sup>2</sup> Institute of Geochemistry and Petrology, ETH Zurich, Clausiusstrasse 25 I CH-8092 Zurich,

8 Switzerland

9 <sup>3</sup> Department of Earth Sciences, University of Geneva, Geneva, Switzerland

10 <sup>4</sup> Teledyne Photon Machines, 384 Gallatin Park Drive, Bozeman, MT 59715, USA

11 <sup>5</sup> Department of Analytical Chemistry, National Institute of Chemistry, Hajdrihova 19, SI-

12 1000 Ljubljana, Slovenia.

13 <sup>6</sup> Geochronology and Tracers Facility, British Geological Survey, Environmental Science

14 Centre, Nottingham, NG12 5GG, UK

15 <sup>7</sup> Department of Earth Science, University of California, Santa Barbara, CA 93106, USA.

16

17 **Abstract**

18 Latest advances in laser ablation inductively coupled plasma mass spectrometer (LA-ICPMS)

19 allow for accurate *in-situ* U-Pb dating of carbonate material, with final age uncertainties

20 usually >3% 2σ. Cross-laboratory reference materials (RMs) used for sample-bracketing are

21 currently limited to WC1 calcite with an age of 254.4 ± 6.5 (2σ). The minimum uncertainty

22 on any age determination with the LA-ICPMS method is therefore ≥ 2.5%, and validation by

23 secondary RMs are usually performed on in-house standards. This contribution present a new

24 reference material, ASH-15, a flowstone that is dated here by high-precision Isotope Dilution

25 (ID) TIMS analysis using 36 sub-samples, 1-7 mg each. Age results presented here are



26 slightly younger compared to previous ID dating of ASH-15, but in agreement with *in-situ*  
27 analyses (using WC1 as a RM). We provide new correction parameters to be used as primary  
28 or secondary standardization. The suggested  $^{238}\text{U}/^{206}\text{Pb}$  apparent age, not corrected for  
29 disequilibrium and without common-lead anchoring, is  $2.965 \pm 0.011$  Ma ( $2\sigma$ ). The new  
30 results could improve the propagated uncertainties on the final age with a minimal value of  
31 0.4%, which is approaching the uncertainty of typical ID analysis on, for example, zircon  
32 ( $<1\%$   $2s$ ). We show that although LA-ICPMS spot analyses of ASH-15 exhibits significant  
33 scatter in their isotopic ratios, the down-hole fractionation of ASH-15 is similar to that of  
34 other reference materials. ~~For LA work, we recommend the use of the new ID-TIMS ages~~  
35 ~~that are 1.3-1.5% younger than previously suggested, because of the lower uncertainties~~  
36 ~~(0.4%), the large number of sub-samples ( $n=36$ ), the use of the EARTHTIME isotopic tracers,~~  
37 ~~and the small aliquots (1-7 mg) that are more representative of laser-ablation spot analysis.~~

## 38 1. Introduction

39 Recent advances in laser ablation techniques applied to multi-phase carbonates allow for  
40 accurate dating of a variety of sample types, including calcite cements (Li et al., 2014;  
41 Godeau et al., 2018; Anjiang et al., 2019; Holdsworth et al., 2019), hydrothermal veins  
42 (Coogan et al., 2016; MacDonald et al., 2019; Piccione et al., 2019), fault-related veins,  
43 breccia cement, and slickenfibers (Ring and Gerdes, 2016; Roberts and Walker, 2016; Nuriel  
44 et al., 2017; Hansman et al., 2018; Parrish et al., 2018; Nuriel et al., 2019), and speleothems  
45 (Woodhead and Petrus, 2019). With increasing attention on climatic, seismic, and  
46 environmental events in the geological record there is a growing need for dating techniques  
47 that can be accurately and easily implemented to samples at the sub-millimeter scale. This  
48 newly emerging technique has the potential to contribute to our understanding of the duration,  
49 rate, and extent of these important events in the geological record.



50 The *in-situ* approach has a great research potential for studying texturally complex samples  
51 because it can resolve problems of age mixing of different phases or averaging of continuous  
52 growth at the sub-millimeter scale, and thus increase the overall accuracy of the dated  
53 material. While the precision of traditional isotope-dilution (ID) U-Pb analyses is still  
54 favorable ( $<1\% 2\sigma$ ) (Woodhead and Petrus, 2019), increasing analytical development of the  
55 LA-ICPMS method indicates the potential for improving the currently reported uncertainties  
56 (usually  $>3\% 2\sigma$ ). Finding the right matrix-matched reference material (RM) is a major  
57 hurdle for LA analyses of carbonates because of the variety of mineralogy (calcite, dolomite,  
58 and aragonite), textures, composition (e.g. high-magnesium calcite, high common-lead), and  
59 ages (e.g. low radiogenic lead in young samples). Textural differences such as  
60 microcrystalline, fine- and coarse-grained material, between the unknown and RMs can  
61 contribute to high uncertainties due to differences in ablation efficiency, down-hole  
62 fractionation, and differences in crater morphology (e.g. Guillong et al., 2020 and Elisha et al,  
63 2020, this issue). Observed deviations are potentially up to 20% of the final intercept age  
64 depending on the degree of crater geometry mismatch and are related to either to downhole  
65 fractionation and/or matrix effects (Guillong et al., 2020).

66 Currently, the most commonly used procedure for mass-bias correction in the LA method, is  
67 by standard-sample bracketing. For this, the  $^{238}\text{U}/^{206}\text{Pb}$  LA-age of the RMs is corrected to the  
68 true RM's  $^{238}\text{U}/^{206}\text{Pb}$  apparent age (not corrected for disequilibrium) as measured  
69 independently by an ID method (e.g. ID-TIMS). The RMs are measured throughout each  
70 session along with the unknown samples, and a normalization factor is applied to correct both  
71 the RMs and the unknowns. Uncertainty propagation onto the age of the unknowns includes  
72 the uncertainties of the 'true' RM age. As a result, the accuracy of the LA analyses can only  
73 be as good as the uncertainties on the age of the RMs which is by itself subjected to analytical  
74 challenges due to natural heterogeneities, impurities, and textural complexities at the sub-



75 millimetre scale. It is therefore essential that the ‘true age’ of the reference material will  
76 reflect these complexities while maintaining minimal uncertainties.

77 Currently, several in-house standards are being used as reference materials, including Duff  
78 Brown Tank (64 Ma; Hill et al., 2016), and JT ( $13.797 \pm 0.031$  Ma; Guillong et al., 2020).  
79 The only well-characterized reference material that is distributed across laboratories is the  
80 WC1 calcite with an age of  $254.4 \pm 6.5$  2s (2.5%) (Roberts et al., 2017). The use of WC1  
81 alone for mass-bias correction has several disadvantages. First, it is highly recommended  
82 with all in situ U-Th-Pb geochronology to use secondary RMs to validate any correction  
83 parameters that are being used, and to appropriately propagate uncertainties. Second, the  
84 relatively high uncertainty (2.5%) on the age of WC1 sets a minimal uncertainty on any LA  
85 U-Pb age determination. Finally, the quantity of the WC1 sample that is currently available  
86 for future work is limited and is likely to not fully meet the growing demands of the LA  
87 scientific community; although, we note here that there is a potential for further sample  
88 collection from the original site.

89 This contribution introduces a new carbonate reference material that can be widely used for  
90 *in-situ* dating of calcite as primary or as cross-reference material with other available  
91 standards. We characterise the reference material at various resolutions using a combination  
92 of (1) laser ablation imaging (20  $\mu\text{m}$  square beam); (2) LA spot analysis,  $\sim 80\text{-}110$   $\mu\text{m}$  in  
93 diameter, conducted on both multi-collector (MC) and single collector inductively coupled  
94 plasma mass spectrometer (ICPMS); and (3) ID-TIMS analyses of 36 sub-samples  $\sim 1\text{-}7$  mg  
95 aliquots. We discuss several key issues related to the use of ASH-15 sample as a RM,  
96 including down-hole fractionation, heterogeneities, previous bulk analyses, and the possible  
97 effect of samples size and blank corrections, to provide the best correction parameters and  
98 suggested protocols for users of the LA scientific community.



99 **2. The ASH-15 flowstone**

100 The ASH-15 flowstone was found in Ashalim Cave, a karstic cave in the central Negev  
101 Desert (30°56'36.2" N, 34°44'22.5" E), southern Israel, which is part of the northern margin  
102 of the Saharan–Arabian desert belt. The cave entrance is located at an elevation of 414 m  
103 above sea level and 67 km SE from the Mediterranean Sea coast. The cave is a three-  
104 dimensional hypogene maze with a total length of 540 m, situated in Turonian limestone rock  
105 strata, at depths of 0-31 m below the surface. The cave is richly decorated with vadose  
106 speleothems, such as stalagmites, stalactites and flowstone, which are not active today  
107 because of the aridity of the climate in the area (Vaks et al, 2010, 2018), but periods of their  
108 deposition correspond to past episodes of wet climate in present-day desert. The thickness of  
109 the speleothems varies from several cm to a few tens of cm. The soil above the cave is  
110 silicate loess, originated mainly from aeolian dust (Crouvi et al., 2010) and the present day  
111 vegetation is composed of sparse xeric shrubs with <10% vegetation cover.

112 The vadose speleothems of Ashalim Cave are composed of low-Mg calcite, and are divided  
113 into a relatively thick Pliocene Basal layer, and thinner Pleistocene layers above it. The Basal  
114 layer varies from 5 to 25 cm in thickness and comprises c. 90% of the speleothem volume in  
115 the cave. It is composed of massive yellow calcite crystals (Fig. 1a-b), often showing  
116 continuous growth in stalagmites and flowstone, suggesting deposition from continuously  
117 dripping water. In all speleothems the Basal layer is terminated at its top by a <1 mm layer of  
118 microcrystalline calcite, evaporite minerals and reddish clays (Fig. 1a), that is interpreted as a  
119 hiatus (growth break) separating the Basal Pliocene layer and Quaternary layers above it  
120 (Vaks et al., 2013). The thickness of Pleistocene top layers varies from several mm to 17 cm,  
121 but usually does not exceed a few cm, comprising about 10% of the speleothem volume in  
122 the cave. It is composed of alternating layers of brown calcite, with the youngest top layer  
123 (where found) composed of yellow calcite. Several variably colored layers <1 mm thick of



124 microcrystalline calcite, evaporite minerals and reddish clays are found within the columnar  
125 crystalline structure, suggesting hiatuses in speleothem deposition (Vaks et al., 2013).

126 The youngest periods of speleothem deposition in several Ashalim Cave speleothems were  
127 dated by U-Pb method and occurred from 221 ka to 190 ka and from 134 to 114 ka (Vaks et  
128 al, 2010). Earlier periods of deposition were dated by the U-Pb method on ASH-15 flowstone  
129 and are dated to  $1.272 \pm 0.018$  Ma (ASH-15-C), and the Basal layer of ASH-15 flowstone  
130 (layers D-K) dated to c.  $\sim 3.1$  Ma (Fig 1a). These layers have been dated in three different labs  
131 following several protocols for ID analysis (Vaks et al., 2013; Mason et al., 2013). The U  
132 concentrations in speleothem calcite range between 1.9 and 19.7  $\mu\text{g/g}$  and the amounts of  
133 non-radiogenic Th are negligible (Vaks et al., 2010).

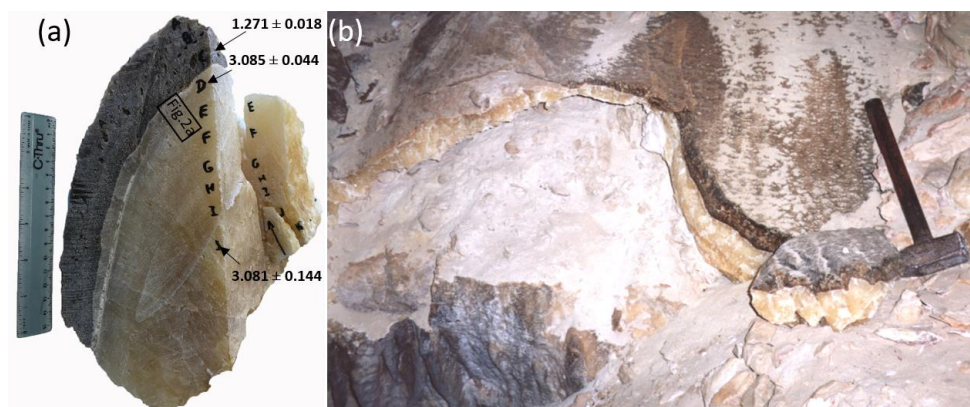

134

135 **Figure 1.** Sample ASH-15 from Ashalim Cave. (a) ~5 kg block of sample ASH-15 flowstone  
136 consisting of the massive Pliocene yellow Basal layer (>2 cm calcite crystals; section D–K)  
137 and the brown Quaternary layer (top section, A) the thin layer between the two  
138 stratigraphic members represents a growth break (hiatus). The main U-Pb ages of Vaks et al.,  
139 2013 are indicated. In-situ flowstone within Ashalim Cave from which ASH-15 was sampled,  
140 showing the large reservoir of this flowstone.

141



### 142 3. Sample ASH-15 textural characterization

143 The ASH-15 thin-section includes section D and E ~~of the ASH-15 sample~~ (see location in  
144 Fig.1a). Overall the thin-section examination indicates that the original texture is preserved  
145 with consistent growth direction, no observed hiatus, and no indications for dissolution and  
146 recrystallization. A spot analysis array, 85  $\mu\text{m}$  in diameter, targeted ~~along~~  ~~with bands~~ and  
147 perpendicular to growth ~~are~~ visible in Fig. 2a-c. The ASH-15 sample shows no luminescence  
148 under cathodoluminescence light (Fig. 2c), suggesting formation under oxidising conditions.  
149 The slight bright luminescence observed within grain boundaries, discontinuities, and veins  
150 (arrows in Fig. 2b-c) may suggest ~~for~~ the presence of fluid inclusions, textural differences, or  
151 some local replacement within these areas. These areas should be avoided if possible during  
152 spot analysis. The relatively homogenous low luminescence may suggest for a single-phase  
153 continuous calcite growth, whereby precipitation occurred relatively rapid from the same  
154 fluid source (e.g. with consistent  $\text{Mn}^{2+}$   $\text{Fe}^{2+}$  composition) and/or under similar precipitation  
155 redox conditions. This 15 cm thick, ~3 Ma Pliocene layer (section D-K) is essentially of the  
156 same age. For this reason, previous dating of this sample also considered a similar initial  
157  $^{234}\text{U}/^{238}\text{U}$  activity ratio for disequilibrium correction (Mason et al., 2013; Vaks et al., 2013).  
158 The ASH-15 reference material consists of the whole Pliocene section that terminates with a  
159 sharp transition to the darker Pleistocene layers above it (section A-C; see Fig. 1b). About 3  
160 kg of ASH-15 sample are excavated from the Ashalim Cave (Fig. 1a), and potentially much  
161 more can be sampled in the future (we estimate more than 10 kg of sample; Fig. 1b). The  
162 ASH-15 flowstone is therefore a good candidate for a reference material because of its large  
163 volume, high U concentrations, and potentially homogenous age which will be examine next.

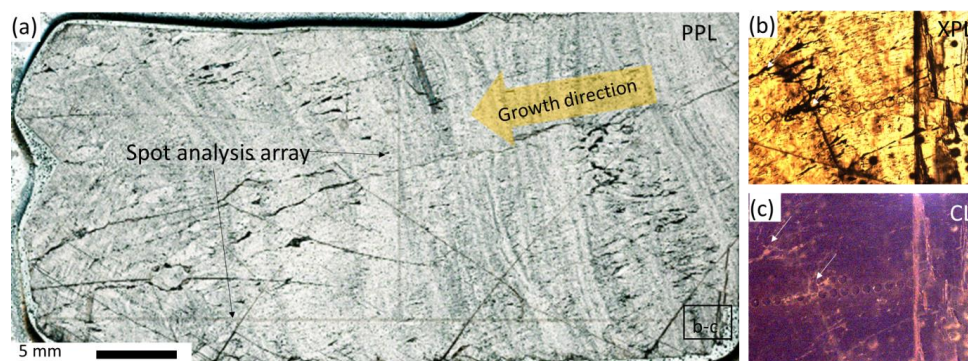

164

165 **Figure 2.** ASH-15D-E thin-section. (a) cross-polarized scan of ASH-15D-E thin-section, 36  
166 mm long, showing continuous growth (no hiatus), and consistent growth direction (indicated  
167 with yellow arrow). Spot analyses are targeted either parallel to growth band or **perpendicular**  
168 **to growth direction**; (b) close-up on spot analyses (location is shown in a) with 85  $\mu$ m  
169 diameter; (c) CL image of the same area showing no luminescence and some bright  
170 luminescence within grains boundaries and veins (arrows).

## 171 4. Methods

### 172 4.1. Elemental mapping

173 The sample ASH-15 was cut perpendicular to the **growth bands** of section D and E (see  
174 Fig.1b) in order to examine heterogeneities across **growth bands** and within. Thin-sections  
175 were then examined under plane- and cross-polarized light (XPL/PPL), and  
176 cathodoluminescence (CL) microscopy (Fig. 2). The central part of the thin-section was also  
177 analyzed for elemental distribution of selected elements. The elemental maps were measured  
178 via LA-ICPMS, carried out on a 193 nm ArF excimer laser ablation system (Analyte G2  
179 Teledyne Photon Machines Inc., Bozeman MT) coupled to an ICP-QMS (Agilent 7900,  
180 Agilent Technologies, Santa Clara CA). The laser was equipped with a Photon Machines  
181 HelEx II ablation chamber and an Aerosol Rapid Introduction System (ARIS). The  
182 experiments were carried out using acquisition parameters (both on the ICP and on the laser)





183 modelled using the approach of van Elteren et al (2019; 2018) to avoid artefacts (e.g., aliasing,  
184 smear, blur). All images (500x500 pixels) were acquired using a 20  $\mu\text{m}$  square beam, fluence  
185 of 3.5  $\text{Jcm}^{-2}$ , 294 Hz repetition rate and dosage of 10 (amounting to a scanning speed of 588  
186  $\mu\text{ms}^{-1}$ ). The masses monitored were  $^{24}\text{Mg}$ ,  $^{55}\text{Mn}$ ,  $^{63}\text{Cu}$ ,  $^{85}\text{Rb}$ ,  $^{88}\text{Sr}$ ,  $^{137}\text{Ba}$ ,  $^{206}\text{Pb}$ ,  $^{208}\text{Pb}$ ,  $^{232}\text{Th}$ ,  
187 and  $^{238}\text{U}$  and the images were constructed using Photon Machines' HDIP data reduction  
188 software (van Malderen, 2017).

#### 189 4.2. LA-MC-ICPMS spot analyses

190 A thin section of ASH-15 was dated by U-Pb laser ablation multi-collector inductively  
191 coupled plasma mass spectrometry (LA-MC-ICPMS) following the method described in  
192 Nuriel et al. (2017). A Nu Plasma 3D was employed in conjunction with a Photon Machines  
193 Excite 193nm Excimer laser equipped with a HelEx two volume cell. The laser was fired for  
194 15 s during analysis, using a repetition rate of 10 Hz, a spot size of 85  $\mu\text{m}$ , and a fluence of approx.  
195 1  $\text{J/cm}^2$ . The Nu Plasma 3D allows for the simultaneous acquisition of  $^{238}\text{U}$ ,  $^{235}\text{U}$ ,  $^{232}\text{Th}$ ,  $^{208}\text{Pb}$ ,  
196  $^{207}\text{Pb}$ ,  $^{206}\text{Pb}$ ,  $^{204}\text{Pb}(\text{+Hg})$ , and  $^{202}\text{Hg}$ , where  $^{238}\text{U}$ - $^{232}\text{Th}$  are measured on Faraday detectors and  
197 the low-side masses are measured on Daly detectors. Instrumental mass-bias was corrected  
198 using a two-step approach: both the  $^{207}\text{Pb}/^{206}\text{Pb}$  and  $^{206}\text{Pb}/^{238}\text{U}$  ratios were first corrected to  
199 NIST-614 glass reference material in *Iolite 3* using the geochronology reduction scheme  
200 (Paton et al., 2010) to account for both mass-bias ( $^{207}\text{Pb}/^{206}\text{Pb}$ ) and instrumental drift  
201 ( $^{207}\text{Pb}/^{206}\text{Pb}$  and  $^{206}\text{Pb}/^{238}\text{U}$ ). The Tera-Wasserburg data, output from *Iolite*, was then plotted  
202 and  $^{206}\text{Pb}/^{238}\text{U}$  ratios of all RMs and unknowns were adjusted such that the primary calcite  
203 reference material—WC-1—yielded an age of 254 Ma (Roberts et al., 2017). This resulted in  
204 accurate dates for both our secondary calcite RM, Duff Brown Tank (64 Ma; Hill et al., 2016)  
205 and a zircon RM (Sri Lanka, 564 Ma; Gehrels et al., 2008), of  $64.8 \pm 3.4$  Ma and a  
206  $^{207}\text{Pb}/^{206}\text{Pb}$  date of a  $566.0 \pm 2.8$  Ma. Uncertainty propagation of individual ratios was  
207 assessed by reproducibility of the NIST614 and SL RMs (n=44 in both cases) and added in



208 quadrature such that the MSWD of each weighted average is  $\leq 1$  and that the uncertainty is no  
209 better than 2% (long-term reproducibility); this resulted in propagated uncertainties of 2.5%  
210 and 2% for the  $^{206}\text{Pb}/^{238}\text{U}$  and  $^{207}\text{Pb}/^{206}\text{Pb}$  ratios, respectively. Given that the typical  
211 uncertainties of the  $^{206}\text{Pb}/^{238}\text{U}$  and  $^{207}\text{Pb}/^{206}\text{Pb}$  ratios of the unknowns was  $>10\%$  and  $>3\%$ ,  
212 respectively, the uncertainty propagation on individual ratios had little effect on the  
213 calculation of the final date of ASH-15. The thin section of ASH-15 was measured both  
214 parallel to the length of section (303 spots, and perpendicular to it (101 spots). Data are  
215 plotted using Isoplot (Ludwig, 1998).

#### 216 **4.3. LA-ICPMS spot analyses**

217 Analyses were conducted at the Geochronology and Tracers Facility, British Geological  
218 Survey (Nottingham, UK). The instrumentation comprised a New Wave Research 193UC  
219 excimer laser ablation system fitted with a TV2 cell, coupled to a Nu Instruments Attom  
220 single collector inductively coupled plasma mass spectrometer (ICP-MS). The method  
221 follows the protocols described in Roberts and Walker (2016) and Roberts et al. (2017). Laser  
222 parameters varied slightly per session, but typically involve a pre-ablation cleaning spot of  
223  $150\ \mu\text{m}$ , fired at 10 Hz with a fluence of  $\sim 6\ \text{J}/\text{cm}^2$  for 2 seconds, and ablation conditions of  
224  $80\text{-}100\ \mu\text{m}$  spots, fired at 10 Hz with a fluence of  $\sim 6\text{-}8\ \text{J}/\text{cm}^2$  for 25-30 seconds. A 60 second  
225 background is taken before every set of standard-bracketed analyses, and a 5 second washout  
226 is left between each ablation. Normalization of Pb-Pb ratios is achieved using NIST614 glass  
227 (values of Woodhead and Hergt, 2001), and WC-1 carbonate for Pb-U ratios (Roberts et al.,  
228 2017). Data reduction uses the Time Resolved Analysis function of the Nu Instruments  
229 Attolab software, and an excel spreadsheet, with uncertainty propagation following the  
230 recommendations of Horstwood et al. (2016).

231



#### 232 4.4. ID-TIMS U-Pb geochronology

233 Isotope dilution thermal ionization mass spectrometry (ID-TIMS) U-Pb geochronology was  
234 performed at the Institute of Geochemistry and Petrology of ETH Zurich (ETHZ) and at the  
235 Department of Earth Sciences of the University of Geneva (UNIGE). Millimeter-sized chips  
236 of the ASH-15-D and ASH-15-K calcite were extracted using stainless steel tools. Larger  
237 chips were further sub-divided resulting in ~1-7 mg aliquots. Individual chips were  
238 transferred into 3 ml Savillex beakers and repeatedly ultrasonically cleaned in ultrapure  
239 acetone and water. Cleaned samples were transferred into pre-cleaned 3 ml Savillex beakers,  
240 spiked with ~5-10 mg EARTHTIME ( $^{202}\text{Pb}$ - $^{205}\text{Pb}$ - $^{233}\text{U}$ - $^{235}\text{U}$ ) tracer solution (Condon et al.,  
241 2015) and dissolved in 6N HCl at 120°C on a hotplate for ~30 minutes to assure complete  
242 dissolution and sample-spike equilibration. Dissolved samples were dried down and  
243 redissolved in 1N HBr. Uranium and Pb were separated using a single-column (50  $\mu\text{l}$ , AG1-  
244 X8 resin) HBr-HCl anion exchange chemistry. The Pb fraction was dried down with a drop of  
245  $\text{H}_3\text{PO}_4$  after a single column pass. Uranium was dried down, redissolved in 3N HCl and  
246 further purified with a HCl-based second column pass before drying it down with a drop of  
247  $\text{H}_3\text{PO}_4$ . Uranium and Pb were loaded on outgassed single Re filaments with ~1  $\mu\text{l}$  of Si-gel  
248 emitter for thermal ionization mass spectrometry. Uranium and Pb isotope ratios were  
249 measured on a Thermo TRITON Plus at ETHZ and a Thermo TRITON at UNIGE. Lead  
250 isotopes were measured on the axial secondary electron multiplier employing dynamic peak-  
251 hopping routine collecting masses (202), 204, 205, 206, 207 and 208. Measured Pb isotope  
252 ratios were corrected for mass fractionation either using the double spike (ETHZ) or using a  
253 mass fractionation factor of  $0.15 \pm 0.03$  ‰/amu for single Pb spiked samples (UNIGE).  
254 Uranium isotope ratios were measured as uranium-oxide ( $\text{UO}_2$ ) employing a static  
255 measurement routine with Faraday cups connected to amplifiers with  $10^{13}$  ohm feedback  
256 resistors (von Quadt et al., 2016; Wotzlaw et al., 2017). Isotope ratios were corrected for



257 isobaric interferences from minor  $\text{UO}_2$  isotopologues (Wotzlaw et al., 2017) and for mass  
258 fractionation using the double spike assuming a  $^{238}\text{U}/^{235}\text{U}$  ratio of  $137.818 \pm 0.045$  (Hiess et  
259 al., 2012) for sample and blank. Total procedural Pb blanks for the HBr-based chemistry at  
260 ETHZ are consistently between 0.2 and 0.4 pg. We therefore attribute up to 0.4 pg to  
261 laboratory blank with the remaining common Pb being attributed to initial common Pb. Total  
262 procedural blanks measured at UNIGE yielded an average of 1.15 pg that was taken as the  
263 laboratory blank contribution. Data reduction and uncertainty propagation was performed  
264 using Tripoli and an Microsoft Excel-based spreadsheet that uses the algorithms of Schmitz  
265 and Schoene (2007). Isochron calculations were performed using IsoplotR (Vermeesch,  
266 2018). All uncertainties are reported at 95% confidence ignoring systematic uncertainties  
267 associated with the tracer calibration and decay constants unless otherwise stated.

## 268 5. Results

269 All analyses were performed on ASH-15-D-K yellow Pliocene layer, abbreviated here as  
270 “ASH-15” unless specification of ASH-15-D, E etc. is indicated. The ASH-15-A-C brown  
271 Pleistocene layer is not part of the ASH-15 suggested reference material.

### 272 5.1. LA elemental mapping

273 Elemental mapping for  $^{88}\text{Sr}$ ,  $^{137}\text{Ba}$ ,  $^{206}\text{Pb}$ ,  $^{208}\text{Pb}$ ,  $^{238}\text{U}$  and  $^{238}\text{U}/^{206}\text{Pb}$  ratio shows that the  
274 distribution of most elements is relatively homogeneous (Fig.3), and in good accordance with  
275 the luminescence data. Higher intensities for  $^{238}\text{U}$  and  $^{88}\text{Sr}$  were observed along grain  
276 boundaries and discontinuities, whereas Pb and the rest of the trace elements are more  
277 homogeneously distributed, arguing for environmental conditions that have kept steady during  
278 the deposition. Ten random regions of interest (ROI) were selected throughout the sample to  
279 mimic 10 spot analysis carried out at 85-90 microns spot size – just like one would do for U-  
280 Pb geochronology, for example. These ROIs were generated by drawing on the map circular



281 regions with the radius of 85 or 90 microns in diameter. The pixels comprising each ROI  
282 were pooled together as representing the equivalent of a single spot analysis. The statistical  
283 data for each cluster (data are given in supplementary file) was compared. The average values  
284 for all pixel data is within 2 standard errors and in good agreement, indicating that at least  
285 based on the elemental distribution we measured, the sample is relatively homogeneous for a  
286 natural sample. To further investigate the chemical homogeneity of the sample, a random  
287 transect through one of the growth zones was drawn and the signal intensities for  $^{238}\text{U}$  were  
288 extracted. The transect data also indicate that  $^{238}\text{U}$  variations are within 2 standard errors of  
289 the average value.

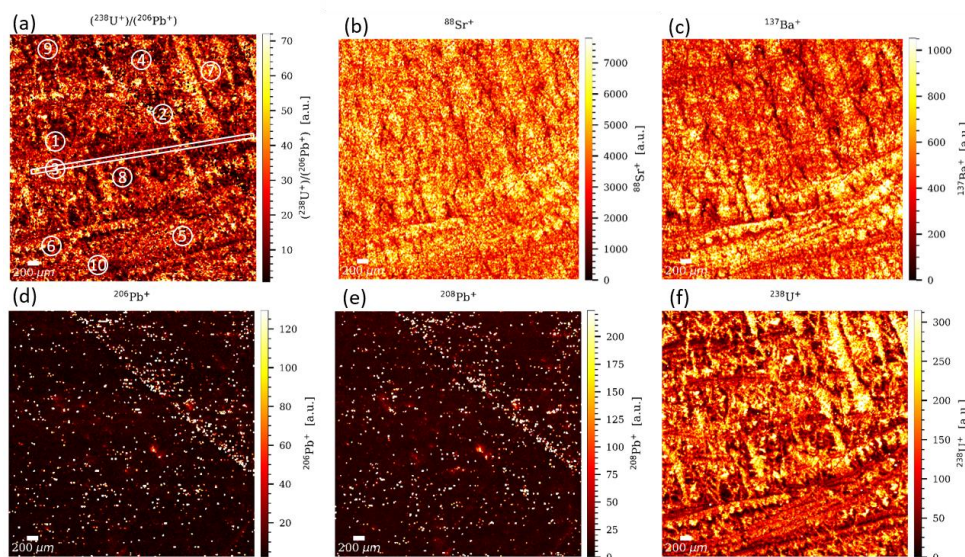

290

291 **Figure 3.** Signal intensity maps of ASH-15. for  $^{238}\text{U}/^{206}\text{Pb}$ ,  $^{88}\text{Sr}$ ,  $^{137}\text{Ba}$ ,  $^{206}\text{Pb}$ ,  $^{208}\text{Pb}$ , and  $^{238}\text{U}$   
292 (a-d). The plotted signal was corrected for blank and analytical drift of the instrumentation.  
293 Note that each distribution map has its own signal intensity scale. The position of the regions  
294 of interest and transect is shown in (a). The circles designating the location of the regions of  
295 interest are not at scale.



## 296 5.2. LA-MC-ICPMS spot analyses

297 Data and calculated ages for the LA-ICPMS transects are shown in Tera-Wasserburg space in  
298 Fig. 4 (n = 379 of 412 total spots). Analyses rejected from the age calculation include those  
299 with  $^{207}\text{Pb}/^{206}\text{Pb}$  uncertainties larger than 0.  = 2) and those with high common-Pb  
300 contents ( $^{208}\text{Pb}$  cps >5000; n = 17). A further 14 spots plotted below the array; these data  
301 ~~were~~ the first 1–2 mm of spots of the lengthwise transect (lower right in Fig. 2a), and suggest  
302 that a small percent of ASH-15 may behave differently during ablation and/or may have been  
303 subsequently modified after crystallization; upon inspection, this portion of the section  
304 contains more pore space and impurities than the majority of the section. The remaining 379  
305 define a normally distributed array with a lower intercept age of  $2.952 \pm 0.043$  Ma (MSWD =  
306 2.5), which is well within uncertainty of the new ID-TIMS data presented ~~herein and the~~  
307 ~~scatter observed in the LA data (i.e., MSWD > 1) is lower compared with~~  ~~scatter observed in~~  
308 ~~the ID-TIMS data.~~ The calculated upper intercept of each transect is equivalent and within  
309 1% of the common Pb composition calculated from the ID-TIMS data. Not surprisingly, the  
310 lengthwise transect reveals a larger spread in common/radiogenic Pb ratios; this transect  
311 crosses more growth zones and has a higher probability of sampling a variety of  
312 concentrations of both Pb and U. Conversely, the more limited spread in common/radiogenic  
313 Pb ratios appears to reflect the limited sampling of growth zones, and would suggest that  
314 individual growth zones contain a relatively limited range of concentrations in U and Pb. The  
315 slightly higher MSWD for the lengthwise transect (2.7) relative to the growth zone transect  
316 (2.5) could also reflect these inherited compositional differences during growth history, and a  
317 ~~resulted~~ “mixing” or “averaging” of different growth phase along calcite continuous growth.

318 Variations of ASH-15 ages during 20 differ  uns using both single (ICPMS) and multi-  
319 collector (MC-ICPM) are shown in Fig. 4b. The ages are calculated using IsoplotR, anchored  
320 to 0.8315 common-lead, and are not corrected for disequilibrium. Although there is a large



321 scatter in the ages of the different runs the average ages (marked in thick lines) are plotted  
322 close to the new ID-TIMS ages, or slightly younger in age.

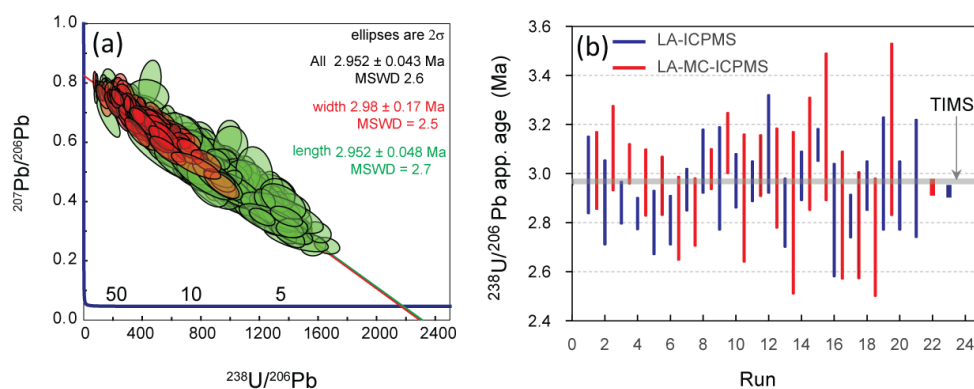

323  
324 **Figure 4.** LA-MC-ICPMS analyses of calcite ASH-15 (n=385). Spots within lengthwise  
325 transect (green) and along growth zone transect (red). Calculated age,  $2\sigma$  error and MSWD  
326 are given for both and for all spots together; (b) Variations of ASH-15 ages during different  
327 runs using both single and multi-collector ICPMS. Ages are calculated using WC1 as primary  
328 MS; the new ID-TIMS age is indicated with a grey line; Ages are calculated using IsoplotR,  
329 anchored to 0.8315 common-lead, and are not corrected for disequilibrium.

### 330 5.3. Down-hole fractionation

331 Reference material is important for correction of both laser-induced elemental fractionation  
332 (LIEF) and in plasma-related ionization efficiency. Ideally, the reference material should  
333 resemble the unknown samples as much as possible in terms of its chemistry (e.g. Mg and Fe  
334 content), texture (i.e. micritic, crystalline), and age. The WC1 and ASH15 are both low-Mg  
335 calcite but they are very different in their textures and age. The ASH15 is a ~3 Ma, well-  
336 crystallized elongated calcite (up to 1 cm) and WC1 is a 254 Ma recrystallized botryoidal  
337 calcite, formed after aragonite. Despite these differences, both WC1 and ASH15 display a  
338 very similar down-hole fractionation pattern (Fig. 5d). Fig. 5 shows stacked integration plots

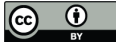

339 of the down-hole raw  $^{206}\text{Pb}/^{238}\text{U}$  ratio of different RMs including, the ASH15, WC-1, and  
340 Duff Brown Tank (Black and Gulson, 1978). The ASH15 display much larger scatter in the  
341 raw data (Fig. 5a) in comparison to both WC1 and Duff Brown Tank (Fig. 5b-c), however,  
342 the average value yielded identical down-hole patterns to that of WC-1 (Fig. 5d). Duff Brown  
343 Tank is also consistent with the down-hole patterns but is less steep in comparison to WC1 and  
344 ASH15 (Fig. 5d). This comparison suggests that down-hole fractionation and laser-induced  
345 elemental fractionation (LIEF) is similar among the different RMs. It is thus suggested that  
346 differences in  $^{206}\text{Pb}/^{238}\text{U}$  ratios ~~between measured and expected~~ in calcite material are likely  
347 to be caused mostly by plasma-ionization differences between unknown samples and RMs.



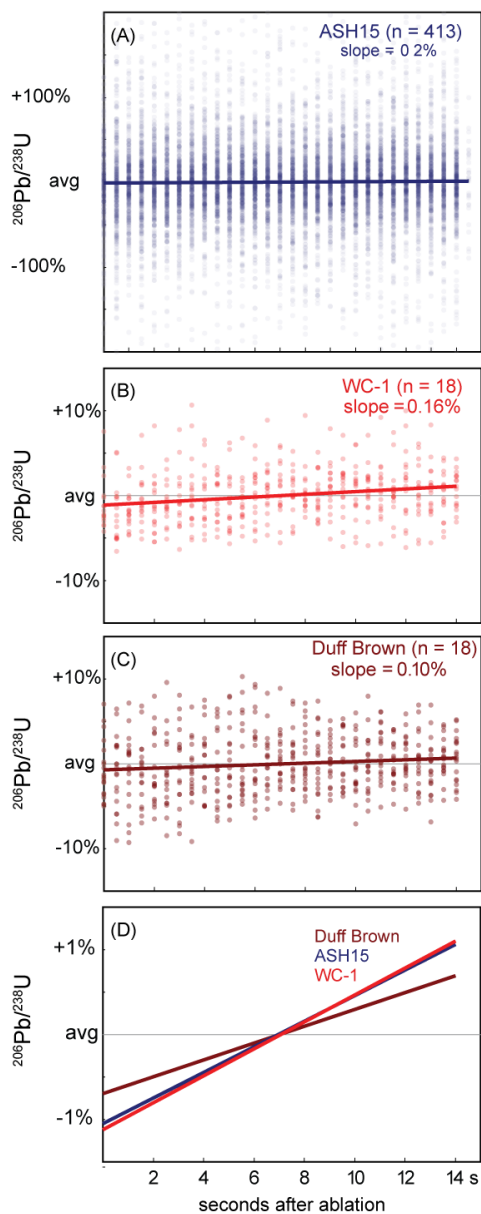

348

349 **Figure 5.** Stacked integration plots of raw  $^{207}\text{Pb}$ -corrected  $^{206}\text{Pb}/^{238}\text{U}$  ratios for calcite  
350 reference materials ASH-15, WC-1, and Duff Brown Tank. The low Pb concentration in  
351 ASH-15 yields more scatter, but average slopes of all RMs are similar, with 1-2% change in  
352 age over 10 seconds (100 pulses) of ablation. The results suggest for minimal differences in  
353 down-hole fractionation of the different RMs.



#### 354 **5.4. High-precision ID-TIMS results**

355 Twelve aliquots of ASH-15D analyzed at ETHZ yielded  $^{238}\text{U}/^{206}\text{Pb}$  ratios between 1096 and  
356 2084 and  $^{207}\text{Pb}/^{206}\text{Pb}$  ratios between 0.0825 and 0.4403. Plotted in Tera-Wasserburg space,  
357 this data yields a single isochron with an initial  $^{207}\text{Pb}/^{206}\text{Pb}$  of  $0.832 \pm 0.015$  (uncertainties are  
358 95% confidence intervals) and a concordia intercept age of  $2.967 \pm 0.022$  Ma (Fig. 6a). The  
359 elevated mean square weighted deviation (MSWD) of 12 is attributed to minor  
360 heterogeneities, most likely in the initial  $^{207}\text{Pb}/^{206}\text{Pb}$  ratio of the speleothem calcite. Twelve  
361 aliquots of ASH-15K analysed at ETHZ returned  $^{238}\text{U}/^{206}\text{Pb}$  ratios between 723 and 2094 and  
362  $^{207}\text{Pb}/^{206}\text{Pb}$  ratios between 0.0720 and 0.5677. In Tera-Wasserburg space, eleven out of  
363 twelve aliquots define a isochron with an initial  $^{207}\text{Pb}/^{206}\text{Pb}$  of  $0.8314 \pm 0.0040$  and a  
364 concordia intercept age of  $2.964 \pm 0.016$  Ma (Fig. 6b). A single aliquot (#5.4) plots  
365 significantly below the isochron defined by the other aliquots. The elevated MSWD of 34  
366 together with the single outlier suggest some heterogeneities in the initial  $^{207}\text{Pb}/^{206}\text{Pb}$  of the  
367 ASH-15K calcite. Thirteen aliquots of ASH-15K analysed at UNIGE (pink color, Fig. 6b)  
368 yielded  $^{238}\text{U}/^{206}\text{Pb}$  ratios between 433 and 1853 and  $^{207}\text{Pb}/^{206}\text{Pb}$  ratios ranging from  
369 0.1856 to 0.6660. Twelve of the thirteen analyses yield define an isochron with an initial  
370  $^{207}\text{Pb}/^{206}\text{Pb}$  of  $0.814 \pm 0.019$  and a Concordia intercept age of  $2.967 \pm 0.065$  Ma. The elevated  
371 MSWD of 36 confirms the minor heterogeneity of the initial  $^{207}\text{Pb}/^{206}\text{Pb}$ .

372 The excellent agreement between the ASH-15D and ASH-15K datasets suggest that the entire  
373 speleothem growth layer between these two growth zones is of equivalent age with minor  
374 heterogeneities in the initial  $^{207}\text{Pb}/^{206}\text{Pb}$  ratio and justifies combining the data into a single  
375 isochron regression. The combined isochron, using 35 of 37 analysed aliquots, yields an  
376 initial  $^{207}\text{Pb}/^{206}\text{Pb}$  of  $0.8306 \pm 0.0033$  and a concordia intercept age of  $2.965 \pm 0.011$  Ma with  
377 a MSWD of 35 (Fig. 6c). We consider the results of the combined isochron regression as the  
378 best reference value for using ASH-15 as a primary reference material.



379 The new TIMS data provide the most extended ~~bulk-analyses work~~ of the ASH-15 sample,  
380 with a total of 37 sub-samples that are separated from bottom (K, n=25) to top (D, n=12)  
381 ~~sections of the sample~~. The ~~relatively~~ high MSWD of 35 is suggested to reflect true  
382 heterogeneities of the dated material, possibly related to impurities that are concentrated  
383 within grain boundaries (as suggested by CL and elemental mapping). We re-calculated  
384 previously determined isochron ages of Vaks et al. (2013) and Mason et al. (2013; Fig. 7).  
385 We obtained concordia intercept ages of  $3.0088 \pm 0.053$  Ma for ASH-15-D (MSWD=11;  
386 n=5) and  $3.0153 \pm 0.042$  Ma for ASH-15-K (MSWD=14; n=5) of Vaks et al. (2013) and  
387  $3.0015 \pm 0.029$  for ASH-15-D (MSWD=2; n=5) of Mason et al. (2013). These ages are  
388 systematically older but still overlap within uncertainty with our new age of  $2.965 \pm 0.011$   
389 Ma (Fig. 7). We speculate that the ~~small but~~ systematic offset between previous results and  
390 our new data may be related to **natural heterogeneities** that are **sampled differently** depending  
391 on sample size but we cannot exclude analytical differences as an additional source of bias.  
392 The origin of this bias between the two techniques should be investigated more  
393 systematically in future. For laser ablation U-Pb work, we recommend the use of the new ID-  
394 TIMS age because of the large number of sub-samples (n=37), and the small aliquots (1-7  
395 mg) that are more representative of laser-ablation spot analysis. In addition, the use of the  
396 precisely and accurately calibrated EARTHTIME tracer solutions (Condon et al., 2015) and  
397 the online mass fractionation correction provided by the double Pb and double U tracer are an  
398 important advantage of this method compared to previous bulk analyses. The excellent  
399 interlaboratory reproducibility gives us additional confidences that our ID-TIMS data provide  
400 the most accurate characterization of the U-Pb systematics of the ASH-15 calcite for use as a  
401 primary reference material.

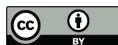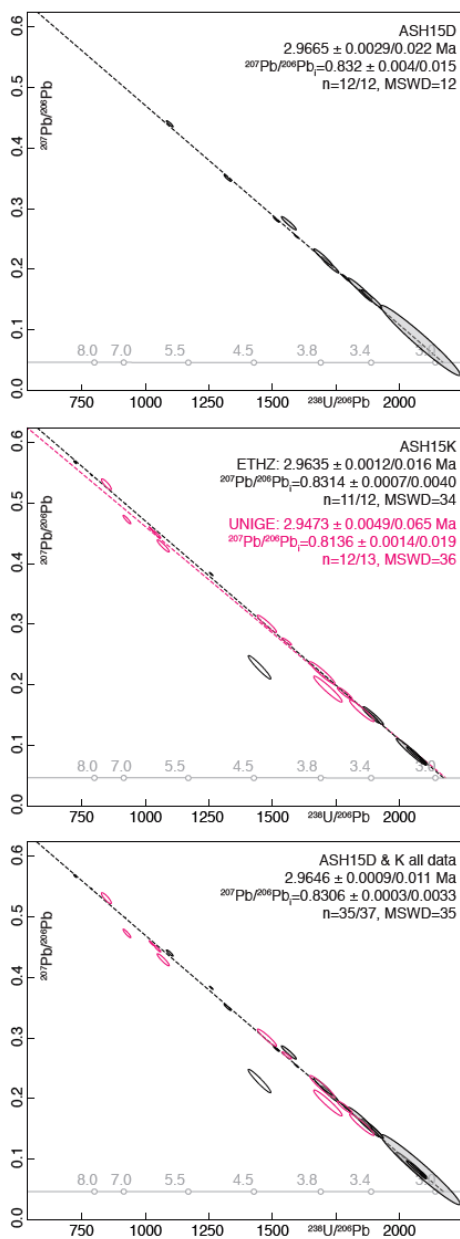

402

403 **Figure 6.** ID-TIMS U-Pb results for ASH-15D, ASH-15K, and for both ASH-15D +K.

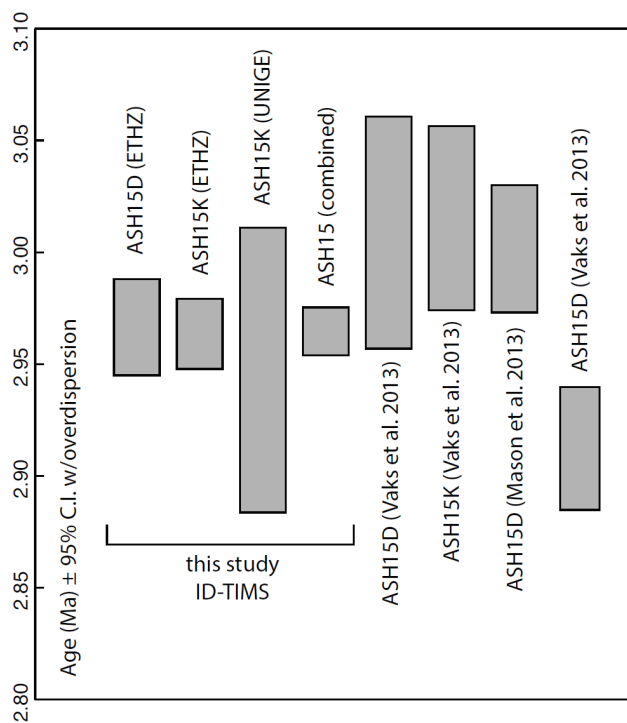

404

405 **Figure 7.** Previous (re-calculated) and new ages of ASH-15 from isotope-dilution U-Pb  
406 analysis. All ages are calculated using IsoplotR and are not corrected for disequilibrium and  
407 are not anchored to common-lead specific value.

## 408 6. Conclusions

409 The ASH-15 speleothem calcite is characterized as a matrix matched reference material for  
410 LA-ICPMS U-Pb geochronology of calcite. ID-TIMS analyses of small 1-7 mg aliquots of  
411 two growth zones suggest sufficient homogeneity with a combined intercept age of  $2.965 \pm$   
412  $0.011$  Ma and an initial  $^{207}\text{Pb}/^{206}\text{Pb}$  of  $0.8315 \pm 0.0026$ . These data are recommended as the  
413 reference values for the ASH-15 calcite reference material. The excellent agreement between  
414 the two growth zones suggest that the entire interval between the two dated layers can be  
415 used with the same reference age. Compared to other calcite reference material (e.g. WC1),

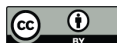

416 ASH-15 is more homogeneous but has lower radiogenic Pb content and therefore requires  
 417 more sensitive instruments (i.e. sector field rather than quadrupole mass spectrometers) to be  
 418 used as a reference material.

**Table 1. U-Th-Pb isotopic data**

| Sample<br>(a)         | Wt.<br>mg<br>(b) | U<br>ppm<br>(c) | Pb<br>ppm<br>(c) | Th<br>U<br>(d) | $^{206}\text{Pb}^*$<br>$\times 10^{-13}$<br>mol<br>(e) | mol %<br>$^{206}\text{Pb}^*$<br>(e) | Pb*<br>Pbc<br>(e) | Pbc<br>(pg)<br>(e) | $\frac{^{206}\text{Pb}}{^{204}\text{Pb}}$<br>(f) |
|-----------------------|------------------|-----------------|------------------|----------------|--------------------------------------------------------|-------------------------------------|-------------------|--------------------|--------------------------------------------------|
| <b>ASH-15D (ETHZ)</b> |                  |                 |                  |                |                                                        |                                     |                   |                    |                                                  |
| 2                     | 2.165            | 2.24            | 0.002            | 0.009          | 0.0931                                                 | 82.28%                              | 1.23              | 1.63               | 105                                              |
| 3                     | 2.392            | 1.26            | 0.001            | -              | 0.0569                                                 | 66.53%                              | 0.52              | 2.34               | 56                                               |
| 5                     | 4.085            | 1.80            | 0.001            | 0.010          | 0.1409                                                 | 80.14%                              | 1.07              | 2.85               | 94                                               |
| 6                     | 5.446            | 1.99            | 0.002            | 0.020          | 0.2110                                                 | 73.23%                              | 0.73              | 6.31               | 70                                               |
| 8                     | 3.994            | 1.90            | 0.002            | 0.018          | 0.1466                                                 | 68.61%                              | 0.58              | 5.49               | 60                                               |
| 10                    | 1.523            | 2.15            | 0.002            | -              | 0.0625                                                 | 80.81%                              | 1.10              | 1.21               | 97                                               |
| 11                    | 1.600            | 1.70            | 0.001            | 0.015          | 0.0519                                                 | 78.34%                              | 0.96              | 1.17               | 86                                               |
| 12                    | 0.965            | 1.18            | 0.001            | 0.039          | 0.0218                                                 | 78.32%                              | 0.98              | 0.48               | 85                                               |
| 13                    | 1.776            | 1.95            | 0.002            | 0.022          | 0.0666                                                 | 75.21%                              | 0.81              | 1.79               | 75                                               |
| 14                    | 2.470            | 1.90            | 0.003            | 0.022          | 0.0908                                                 | 59.47%                              | 0.39              | 5.06               | 46                                               |
| 16                    | 1.827            | 1.65            | 0.003            | 0.014          | 0.0577                                                 | 48.13%                              | 0.25              | 5.09               | 36                                               |
| 17                    | 1.680            | 1.96            | 0.002            | 0.011          | 0.0632                                                 | 73.55%                              | 0.74              | 1.85               | 71                                               |
| <b>ASH-15K (ETHZ)</b> |                  |                 |                  |                |                                                        |                                     |                   |                    |                                                  |
| 3.1                   | 3.025            | 9.94            | 0.025            | 0.033          | 0.5834                                                 | 42.70%                              | 0.20              | 64.16              | 33                                               |
| 3.2                   | 1.313            | 2.56            | 0.009            | 0.025          | 0.0662                                                 | 33.30%                              | 0.13              | 10.86              | 28                                               |
| 4.1                   | 3.200            | 2.62            | 0.008            | -              | 0.1632                                                 | 36.38%                              | 0.15              | 23.39              | 29                                               |
| 5.1                   | 3.662            | 2.28            | 0.004            | 0.036          | 0.1593                                                 | 56.52%                              | 0.35              | 10.04              | 43                                               |
| 5.2                   | 2.229            | 1.17            | 0.001            | 0.019          | 0.0504                                                 | 86.50%                              | 1.72              | 0.63               | 138                                              |
| 5.3                   | 1.548            | 2.13            | 0.002            | 0.030          | 0.0631                                                 | 81.40%                              | 1.17              | 1.17               | 100                                              |
| 5.4 (j)               | 1.221            | 1.42            | 0.002            | 0.021          | 0.0383                                                 | 69.98%                              | 0.62              | 1.34               | 62                                               |
| 7.1                   | 2.108            | 2.47            | 0.001            | -              | 0.1003                                                 | 90.66%                              | 2.58              | 0.84               | 199                                              |
| 7.2                   | 2.595            | 2.94            | 0.002            | 0.010          | 0.1467                                                 | 92.03%                              | 3.08              | 1.03               | 234                                              |
| 9.1                   | 3.125            | 1.30            | 0.001            | 0.000          | 0.0778                                                 | 82.46%                              | 1.25              | 1.35               | 106                                              |
| 10.1                  | 2.525            | 4.77            | 0.002            | 0.008          | 0.2327                                                 | 94.93%                              | 4.99              | 1.01               | 367                                              |
| 10.2                  | 3.269            | 3.25            | 0.002            | 0.003          | 0.2039                                                 | 94.08%                              | 4.23              | 1.04               | 314                                              |
| <b>ASH15K (UNIGE)</b> |                  |                 |                  |                |                                                        |                                     |                   |                    |                                                  |
| 2.1                   | 3.3              | 0.43            | 0.003            | -              | 0.0293                                                 | 19.59%                              | 0.06              | 9.86               | 23                                               |
| 2.2                   | 2.0              | 3.83            | 0.003            | -              | 0.1483                                                 | 79.60%                              | 1.02              | 3.11               | 91                                               |
| 2.4 (j)               | 4.5              | 3.12            | 0.016            | -              | 0.2031                                                 | 18.93%                              | 0.03              | 71.29              | 23                                               |
| 2.5                   | 2.1              | 2.67            | 0.003            | -              | 0.1108                                                 | 73.96%                              | 0.74              | 3.20               | 72                                               |
| 6.1                   | 2.5              | 2.47            | 0.003            | -              | 0.1184                                                 | 71.35%                              | 0.64              | 3.90               | 65                                               |
| 6.2                   | 7.3              | 2.38            | 0.003            | -              | 0.3346                                                 | 69.67%                              | 0.60              | 11.94              | 62                                               |
| 6.3                   | 2.8              | 2.25            | 0.003            | -              | 0.1207                                                 | 62.96%                              | 0.44              | 5.82               | 50                                               |
| 6.4                   | 5.0              | 2.53            | 0.002            | -              | 0.2440                                                 | 78.69%                              | 0.97              | 5.42               | 88                                               |
| 6.5                   | 1.9              | 2.10            | 0.007            | -              | 0.0761                                                 | 36.09%                              | 0.14              | 11.05              | 29                                               |
| 9.2                   | 2.7              | 7.08            | 0.016            | -              | 0.3746                                                 | 47.26%                              | 0.23              | 34.27              | 35                                               |
| 9.3                   | 2.6              | 2.04            | 0.004            | -              | 0.1063                                                 | 48.13%                              | 0.24              | 9.39               | 36                                               |
| 9.4                   | 2.5              | 2.59            | 0.007            | -              | 0.1347                                                 | 44.10%                              | 0.20              | 13.99              | 33                                               |
| 9.5                   | 2.1              | 4.90            | 0.011            | -              | 0.2012                                                 | 47.43%                              | 0.23              | 18.28              | 36                                               |

(a) Fractions are single chips of calcite

(b) mass of fraction in mg

(c) U and total Pb concentrations.

(d) Model Th/U ratio iteratively calculated from the radiogenic  $^{208}\text{Pb}/^{206}\text{Pb}$  ratio and  $^{206}\text{Pb}/^{238}\text{U}$  age.

Fractions without value (-) have  $^{208}\text{Pb}/^{204}\text{Pb}$  distinguishable from common Pb therefore no Th content was calculated.

(e) Pb\* and Pbc represent radiogenic and common Pb, respectively; mol %  $^{206}\text{Pb}^*$  with respect to radiogenic, blank and initial common Pb.

(f) Measured ratio corrected for spike and fractionation only.

(g) Corrected for fractionation, spike, and blank Pb only.

(h) Errors are 2-sigma, propagated using the algorithms of Schmitz and Schoen (1977).

(g) Isochron age calculations are based on the decay constants of Jaffey et al. (1971).

(j) Fraction excluded from isochron regressions



420 **Appendices**

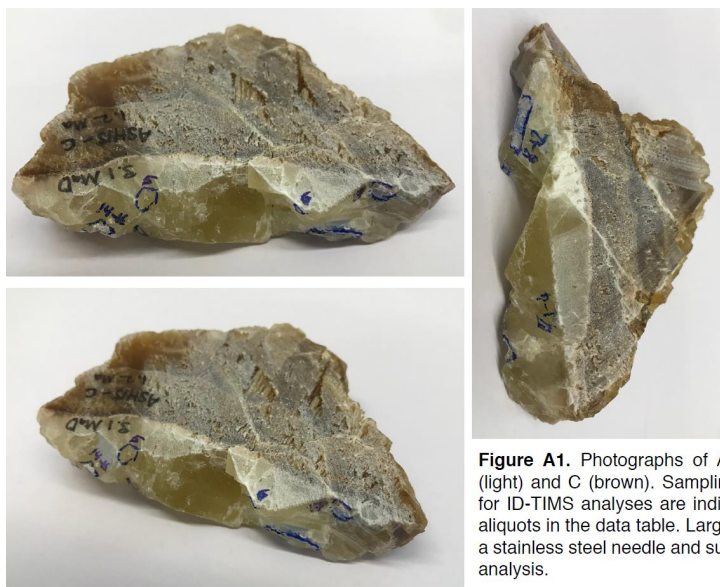

**Figure A1.** Photographs of ASH15 flowstone with layers D (light) and C (brown). Sampling localities of aliquots sampled for ID-TIMS analyses are indicated by numbers matching the aliquots in the data table. Larger pieces were chipped off using a stainless steel needle and subdivided into smaller aliquots for analysis.

421

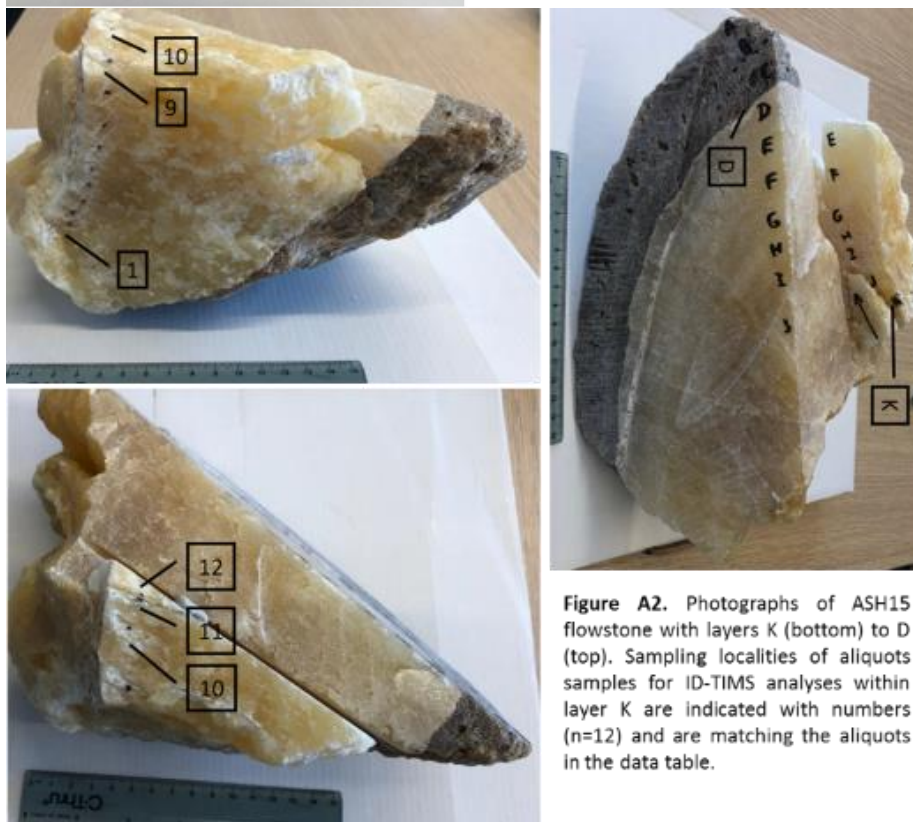

**Figure A2.** Photographs of ASH15 flowstone with layers K (bottom) to D (top). Sampling localities of aliquots samples for ID-TIMS analyses within layer K are indicated with numbers (n=12) and are matching the aliquots in the data table.

422



423 **References:**

- 424 Anjiang, S., Anping, H., Cheng, T., Liang, F., Wenqing, P., Yuexing, F., and Zhao, J.: Laser ablation  
425 in situ U-Pb dating and its application to diagenesis-porosity evolution of carbonate reservoirs, 46,  
426 1127-1140, 2019.
- 427 Condon, D., Schoene, B., McLean, N., Bowring, S., and Parrish, R.: Metrology and traceability of U–  
428 Pb isotope dilution geochronology (EARTHTIME Tracer Calibration Part I), *Geochimica et*  
429 *Cosmochimica Acta*, 164, 464-480, 2015.
- 430 Coogan, L. A., Parrish, R. R., and Roberts, N. M.: Early hydrothermal carbon uptake by the upper  
431 oceanic crust: Insight from in situ U-Pb dating, *Geology*, 44, 147-150, 2016.
- 432 Crouvi, O., Amit, R., Enzel, Y., and Gillespie, A. R.: Active sand seas and the formation of desert  
433 loess, *Quaternary Science Reviews*, 29, 2087-2098, 2010.
- 434 Godeau, N., Deschamps, P., Guihou, A., Leonide, P., Tendil, A., Gerdes, A., Hamelin, B., and Girard,  
435 J.-P. J. G.: U-Pb dating of calcite cement and diagenetic history in microporous carbonate reservoirs:  
436 Case of the Urgonian Limestone, France, 46, 247-250, 2018.
- 437 Guillong, M., Wotzlaw, J. F., Looser, N., and Laurent, O.: New analytical and data evaluation  
438 protocols to improve the reliability of U-Pb LA-ICP-MS carbonate dating, *Geochronology Discuss.*,  
439 2020, 1-17, 10.5194/gchron-2019-20, 2020.
- 440 Hansman, R. J., Albert, R., Gerdes, A., and Ring, U.: Absolute ages of multiple generations of brittle  
441 structures by U-Pb dating of calcite, *Geology*, 46, 207-210, 2018.
- 442 Hiess, J., Condon, D. J., McLean, N., and Noble, S. R.: 238U/235U systematics in terrestrial uranium-  
443 bearing minerals, *Science*, 335, 1610-1614, 2012.
- 444 Holdsworth, R., McCaffrey, K., Dempsey, E., Roberts, N., Hardman, K., Morton, A., Feely, M., Hunt,  
445 J., Conway, A., and Robertson, A.: Natural fracture propping and earthquake-induced oil migration in  
446 fractured basement reservoirs, *Geology*, 47, 700-704, 2019.
- 447 Horstwood, M. S., Košler, J., Gehrels, G., Jackson, S. E., McLean, N. M., Paton, C., Pearson, N. J.,  
448 Sircombe, K., Sylvester, P., and Vermeesch, P.: Community- derived standards for LA-ICP-MS U-  
449 (Th-) Pb geochronology–Uncertainty propagation, age interpretation and data reporting, *Geostandards*  
450 *and Geoanalytical Research*, 40, 311-332, 2016.
- 451 Li, Q., Parrish, R., Horstwood, M., and McArthur, J.: U–Pb dating of cements in Mesozoic ammonites,  
452 *Chemical Geology*, 376, 76-83, 2014.
- 453 Lisiecki, L. E., and Raymo, M. E.: A Pliocene-Pleistocene stack of 57 globally distributed benthic  
454  $\delta^{18}\text{O}$  records, *Paleoceanography*, 20, 2005.
- 455 MacDonald, J., Faithfull, J., Roberts, N., Davies, A., Holdsworth, C., Newton, M., Williamson, S.,  
456 Boyce, A., John, C. J. C. t. M., and Petrology: Clumped-isotope palaeothermometry and LA-ICP-MS  
457 U–Pb dating of lava-pile hydrothermal calcite veins, 174, 63, 2019.
- 458 Mason, A. J., Henderson, G. M., and Vaks, A.: An Acetic Acid-Based Extraction Protocol for the  
459 Recovery of U, Th and Pb from Calcium Carbonates for U-(Th)-Pb Geochronology, *Geostandards*  
460 *and Geoanalytical Research*, 37, 261-275, 10.1111/j.1751-908X.2013.00219.x, 2013.





- 461 Nuriel, P., Weinberger, R., Kylander-Clark, A. R. C., Hacker, B. R., and Craddock, J. P.: The onset of  
462 the Dead Sea transform based on calcite age-strain analyses, *Geology*, *45*, 587-590, 10.1130/g38903.1,  
463 2017.
- 464 Nuriel, P., Craddock, J., Kylander-Clark, A. R., Uysal, I. T., Karabacak, V., Dirik, R. K., Hacker, B.  
465 R., and Weinberger, R. J. G.: Reactivation history of the North Anatolian fault zone based on calcite  
466 age-strain analyses, *Geology*, *47*, 465-469, 2019.
- 467 Parrish, R. R., Parrish, C. M., and Lasalle, S.: Vein calcite dating reveals Pyrenean orogen as cause of  
468 Paleogene deformation in southern England, *Journal of the Geological Society*, 10.1144/jgs2017-107,  
469 2018.
- 470 Piccione, G., Rasbury, E. T., Elliott, B. A., Kyle, J. R., Jaret, S. J., Acerbo, A. S., Lanzirotti, A.,  
471 Northrup, P., Wootton, K., and Parrish, R. R.: Vein fluorite U-Pb dating demonstrates post-6.2 Ma  
472 rare-earth element mobilization associated with Rio Grande rifting, *Geosphere*, *15*, 1958-1972, 2019.
- 473 Ring, U., and Gerdes, A.: Kinematics of the Alpenrhein-Bodensee graben system in the Central Alps:  
474 Oligocene/Miocene transtension due to formation of the Western Alps arc, *Tectonics*, *35*, 1367-1391,  
475 10.1002/2015TC004085/abstract, 2016.
- 476 Roberts, N. M., and Walker, R. J.: U-Pb geochronology of calcite-mineralized faults: Absolute timing  
477 of rift-related fault events on the northeast Atlantic margin, *Geology*, *44*, 531-534, 2016.
- 478 Roberts, N. M., Rasbury, E. T., Parrish, R. R., Smith, C. J., Horstwood, M. S., and Condon, D. J.: A  
479 calcite reference material for LA-ICP-MS U-Pb geochronology, *Geochemistry, Geophysics,  
480 Geosystems*, 2017.
- 481 Schmitz, M. D., and Schoene, B.: Derivation of isotope ratios, errors, and error correlations for U-Pb  
482 geochronology using  $^{205}\text{Pb}$ - $^{235}\text{U}$ -( $^{233}\text{U}$ )-spiked isotope dilution thermal ionization mass spectrometric  
483 data, *Geochemistry, Geophysics, Geosystems*, *8*, 2007.
- 484 Vaks, A., Bar-Matthews, M., Matthews, A., Ayalon, A., and Frumkin, A.: Middle-Late Quaternary  
485 paleoclimate of northern margins of the Saharan-Arabian Desert: reconstruction from speleothems of  
486 Negev Desert, Israel, *Quaternary Science Reviews*, *29*, 2647-2662, 2010.
- 487 Vaks, A., Woodhead, J., Bar-Matthews, M., Ayalon, A., Cliff, R. A., Zilberman, T., Matthews, A.,  
488 and Frumkin, A.: Pliocene-Pleistocene climate of the northern margin of Saharan-Arabian Desert  
489 recorded in speleothems from the Negev Desert, Israel, *Earth and Planetary Science Letters*, *368*, 88-  
490 100, <http://dx.doi.org/10.1016/j.epsl.2013.02.027>, 2013.
- 491 Vaks, A., Bar-Matthews, M., Ayalon, A., Matthews, A., Frumkin, A. Pliocene – Pleistocene  
492 paleoclimate reconstruction from Ashalim Cave speleothems, Negev Desert, Israel., In: Parise, M.,  
493 Gabrovsek, F., Kaufmann, G. & Ravbar, N. (eds) *Advances in Karst Research: Theory, Fieldwork and  
494 Applications*. Geological Society, London, Special Publications, 466 (1), pp. 201-206, 2018.
- 495 van Elteren, J. T., Šelih, V. S., Šala, M., Van Malderen, S. J., and Vanhaecke, F.: Imaging artifacts in  
496 continuous scanning 2D LA-ICPMS imaging due to nonsynchronization issues, *Analytical chemistry*,  
497 *90*, 2896-2901, 2018.
- 498 van Elteren, J. T., Šelih, V. S., and Šala, M.: Insights into the selection of 2D LA-ICP-MS (multi)  
499 elemental mapping conditions, *Journal of Analytical Atomic Spectrometry*, *34*, 1919-1931, 2019.
- 500 van Malderen, S.: Optimization of methods based on laser ablation-ICP-mass spectrometry (LA-ICP-  
501 MS) for 2-D and 3-D elemental mapping, Ghent University, 2017.



- 502 Vermeesch, P.: IsoplotR: A free and open toolbox for geochronology, *Geoscience Frontiers*, 2018.
- 503 von Quadt, A., Wotzlaw, J.-F., Buret, Y., Large, S. J., Peytcheva, I., and Trinquier, A.: High-precision  
504 zircon U/Pb geochronology by ID-TIMS using new 10 13 ohm resistors, *Journal of Analytical Atomic*  
505 *Spectrometry*, 31, 658-665, 2016.
- 506 Woodhead, J., and Petrus, J. J. G.: Exploring the advantages and limitations of in situ U–Pb carbonate  
507 geochronology using speleothems, 1, 69-84, 2019.
- 508 Woodhead, J. D., and Hergt, J. M.: Strontium, neodymium and lead isotope analyses of NIST glass  
509 certified reference materials: SRM 610, 612, 614, *Geostandards Newsletter*, 25, 261-266, 2001.
- 510 Wotzlaw, J.-F., Buret, Y., Large, S. J., Szymanowski, D., and von Quadt, A.: ID-TIMS U–Pb  
511 geochronology at the 0.1‰ level using 10 13 Ω resistors and simultaneous U and <sup>18</sup>O/<sup>16</sup>O isotope  
512 ratio determination for accurate UO<sub>2</sub> interference correction, *Journal of Analytical Atomic*  
513 *Spectrometry*, 32, 579-586, 2017.
